# Supplementary material for: Air temperature changes in Wrocław (SW Poland) in 1773–81 based on a newly discovered series of meteorological measurements
Source: Copernicus journal article supplement (doi:10.5194/egusphere-2025-6326), 2026-01-02
Supplement: Supplementary file [file egusphere-2025-6326-AC1-supplement.pdf]

Review of Christian Pfister: 20.01.2026

The article presents a recently discovered series of meteorological measurements made in Wrocław (SW Poland) in 1773–81 comprising daily observations of air temperature and atmospheric pressure, precipitation, wind force and direction.. The analysis focuses on air temperature extending the regular temperature series for Wrocław back to 1773. the scientific methods and assumptions valid and clearly outlined? The paper is clearly structured and the figures are of high quality. As a result, the Wrocław series will be the longest temperature series in Poland.

The article should be published with minor revisions.

Reply. Thank you very much for the high estimate of our work.

From a climate history perspective, one would have liked to see a more in-depth analysis of the German-language source. It is likely that the Wrocław observations were inspired by the example of the Bern Economic Society, founded in 1759. In 1760, the society implemented a meteorological observation programme. Specifically, this involved measurements of air pressure, air temperature using mercury thermometers with Réaumur scale and precipitation measurements with rain gauges manufactured at the expense of the Society. Results were published in the journal of the society, including detailed information regarding the instruments used. (see Christian Pfister, *Agrarkonjunktur und Witterungsverlauf im westlichen Schweizer Mittelland 1755–1797*. Bern 1975. *Geographica Bernensia*, Reihe G, 2, p.24-26,) BORIS Portal funktioniert erst wieder ab 18.00).

Reply. Thank you very much for this suggestion. Such a version cannot be ruled out, but the historian, co-author of the article, who conducted the research to document this thesis, was unsuccessful. It has not been possible to establish correspondence between the Silesian Patriotic Society in Wrocław and the Economic Society in Bern. This was also not confirmed by the author of the article about the Swiss society, Martin Stuber, "Das Korrespondenznetz der Oekonomischen Gesellschaft Bern, 1759-1800, in: *Kulturen des Wissensim 18. Jahrhundert*, ed. U.J. Schneider, Gruyter 2008, pp. 123-132."

Line 22 specify newspaper "published every other day"

Reply. Done.

Line 246 and 247 give the year

Reply. Done.

Dear Professor Christian Pfister,

Once again, thank you very much for your high assessment of the scientific value of our manuscript and for all your constructive comments.
